# Supplementary material for: Synthesis of Cu2O/CuO Nanocrystals and Their Application to H2S Sensing
Source: MDPI journal article supplement (doi:10.3390/s19010211), 2019-01-08
Supplement: s1 [file s1]

## Supplementary Information

# Synthesis of Cu<sub>2</sub>O/CuO nanocrystals and their application to H<sub>2</sub>S sensing

Kazuki Mikami <sup>1</sup>, Yuta Kido <sup>1</sup>, Yuji Akaishi <sup>1</sup>, Armando Quitain <sup>2</sup>, Tetsuya Kida <sup>3\*</sup>

<sup>1</sup>Department of Applied Chemistry and Biochemistry, Graduate School of Science and Technology, Kumamoto University, Japan

<sup>2</sup>College of Cross-Cultural and Multidisciplinary Studies, Kumamoto University, Japan

<sup>3</sup> Faculty of Advanced Science and Technology, Kumamoto University, Japan

\* Correspondence: [tetsuya@kumamoto-u.ac.jp](mailto:tetsuya@kumamoto-u.ac.jp); Tel.: +81-96-342-3664 (T.K.)

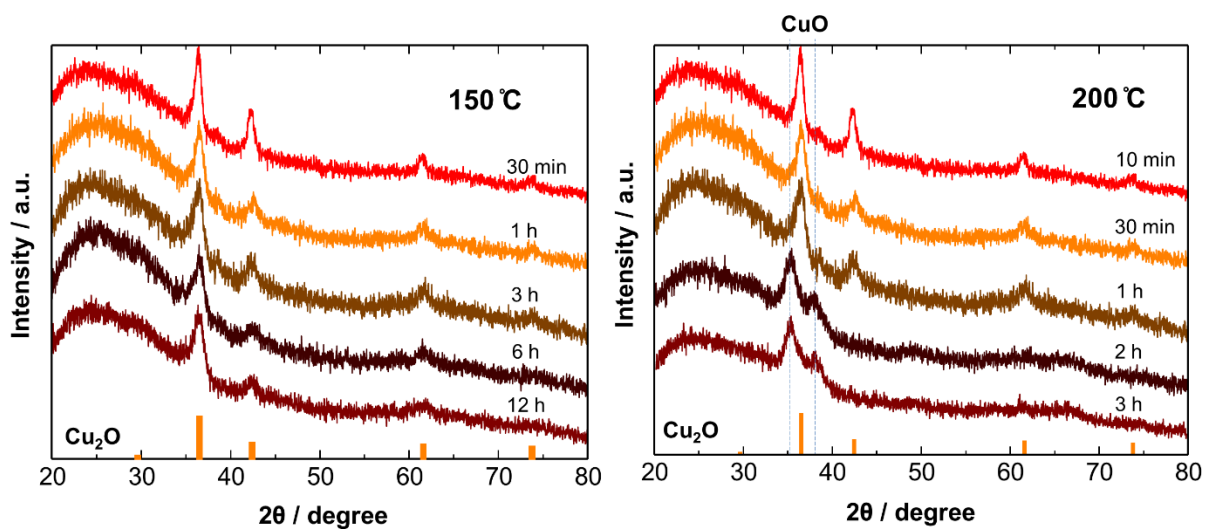

**Figure S1.** XRD patterns of  $\text{Cu}_2\text{O}$  NCs deposited on a Si substrate heated at 150 and 200°C for different periods.

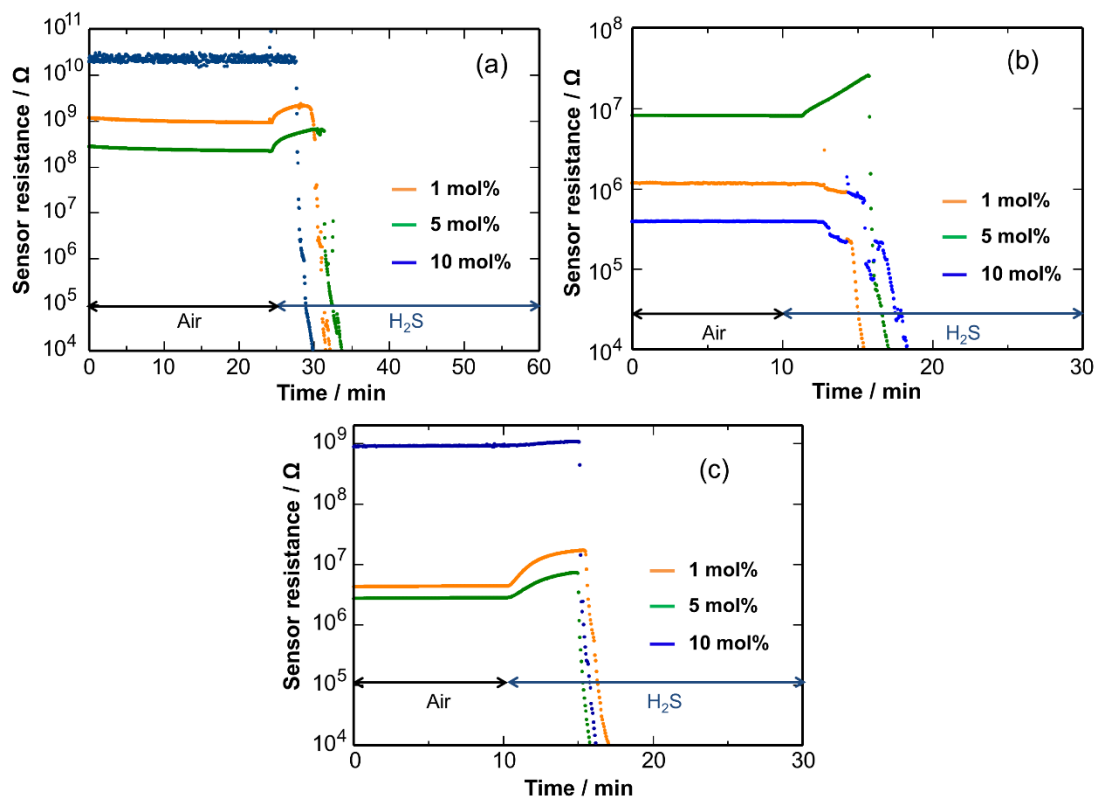

**Figure S2.** Response transients to 8 ppm  $\text{H}_2\text{S}$  in air for the Pd (1, 5, 10 mol%)- $\text{CuO}$  NC sensors at different temperatures. (a) 50, (b) 100, (c) 150°C.
